# Supplementary material for: Camel Milk Mitigates Cyclosporine-Induced Renal Damage in Rats: Targeting p38/ERK/JNK MAPKs, NF-κB, and Matrix Metalloproteinases
Source: MDPI journal article supplement (doi:10.3390/biology10050442), 2021-05-17
Supplement: s1 [file s1]

## Supplementary material

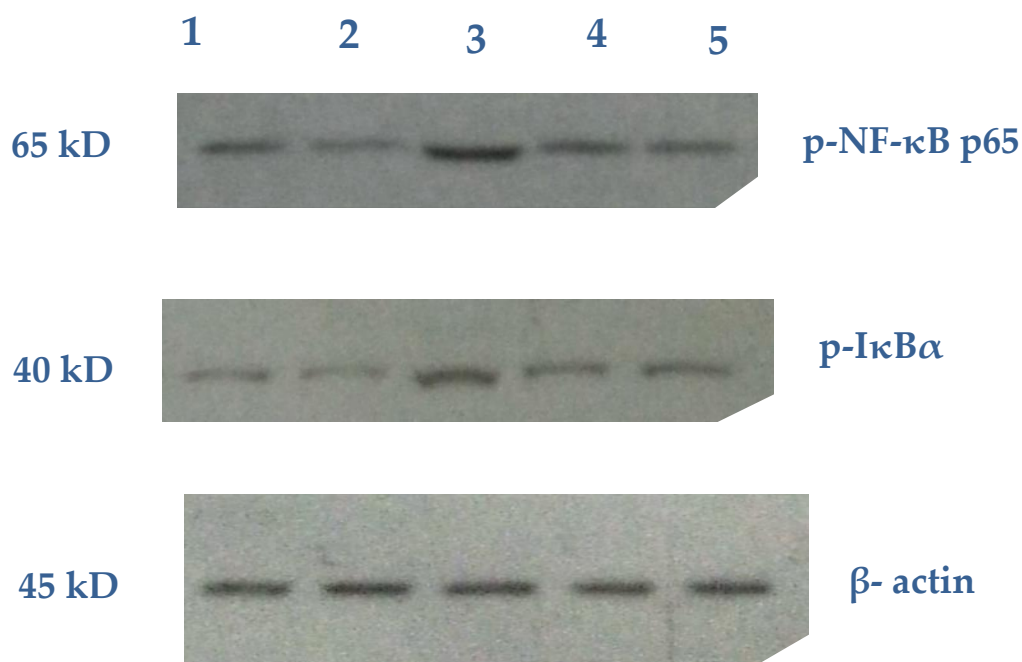

[1]: Control

[2]: Control + camel milk

[3]: Cyclosporine

[4]: Cyclosporine + Camel milk

[5]: Cyclosporine + Quercetin

**Figure S1:** The X-ray film images for Western blot represent the expression level of p-NF-κBp65 , p- IκBα, and the loading control β-actin (**Figure 4** )

## Supplementary material

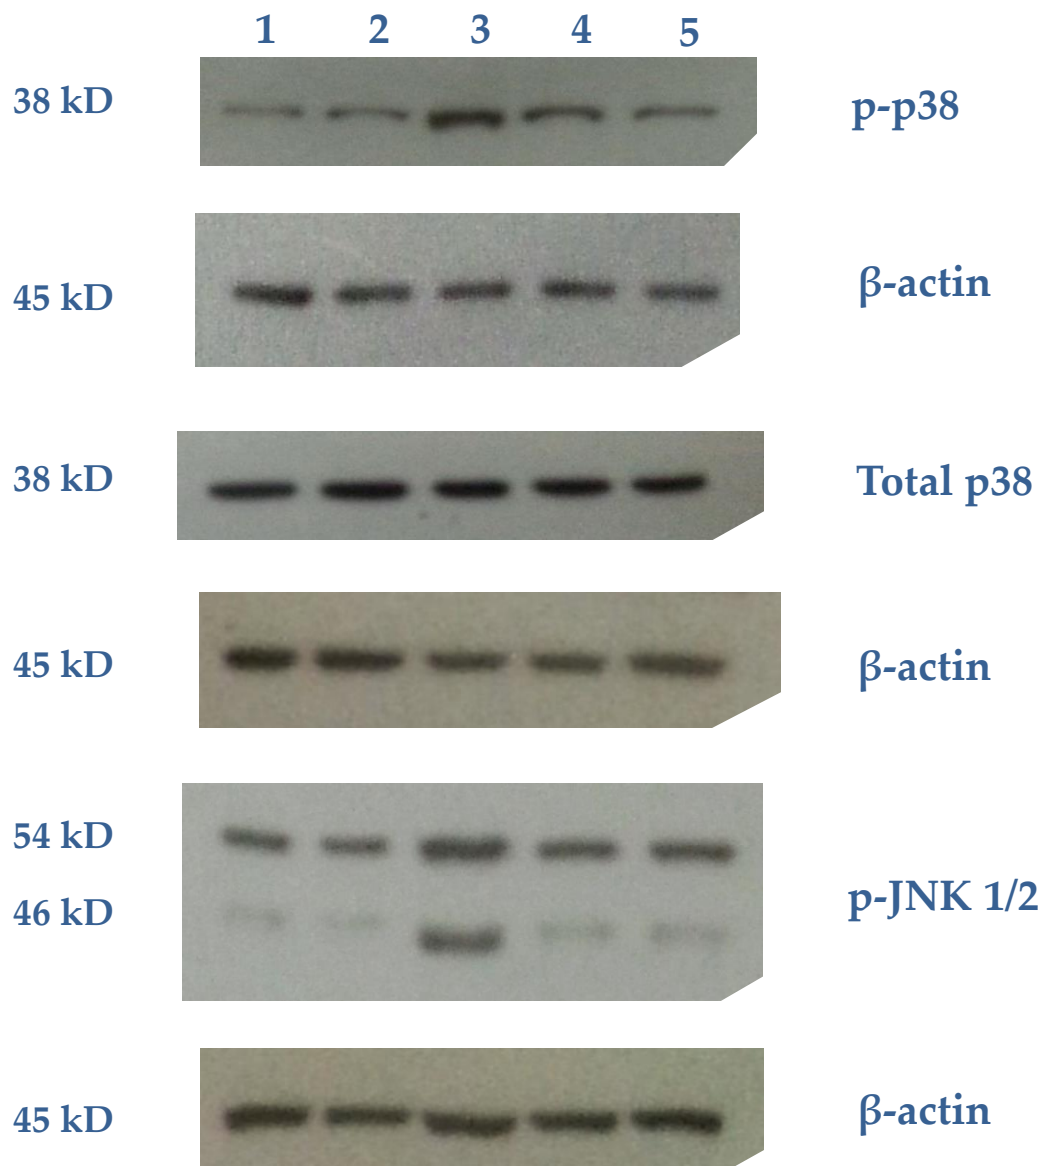

- [1]: Control  
 [2]: Control + camel milk  
 [3]: Cyclosporine  
 [4]: Cyclosporine + Camel milk  
 [5]: Cyclosporine + Quercetin

**Figure S2- A**

# Supplementary material

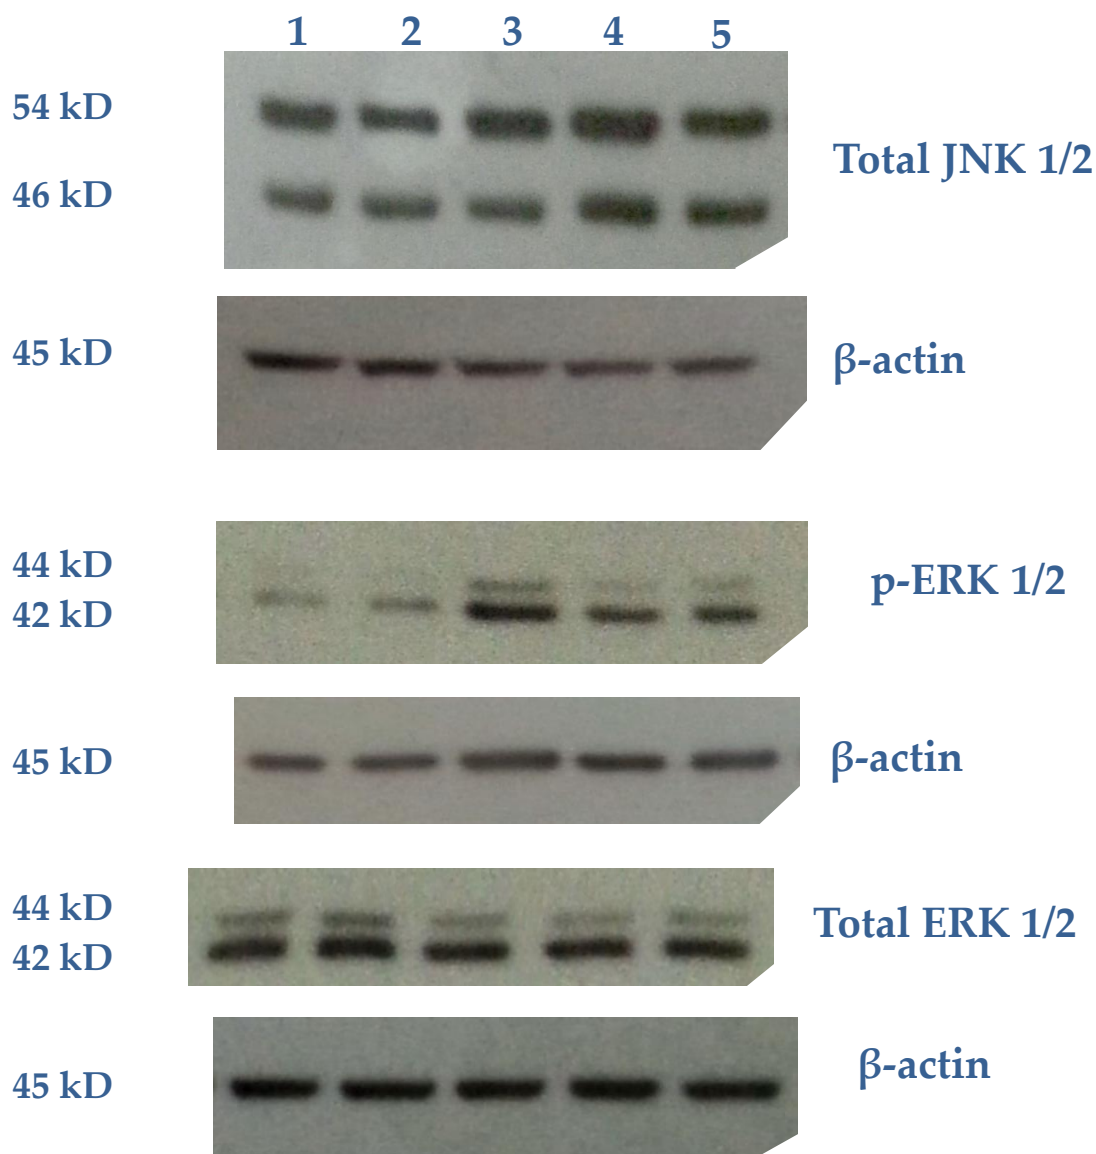

[1]: Control

[2]: Control + camel milk

[3]: Cyclosporine

[4]: Cyclosporine + Camel milk

[5]: Cyclosporine + Quercetin

**Figure S2- B**

**Figure S2:** The X-ray film images for Western blot represent the expression level of p-p38 MAPK, total p38 MAPK, p-JNK1/2, total JNK1/2, p-ERK1/2, total ERK1/2, and the loading control  $\beta$ -actin (**Figure 5**).
